# Supplementary material for: Peptides from Cauliflower By-Products, Obtained by an Efficient, Ecosustainable, and Semi-Industrial Method, Exert Protective Effects on Endothelial Function
Source: Oxid Med Cell Longev. 2019 Feb 6;2019:1046504. doi: 10.1155/2019/1046504 (PMC6381550; doi:10.1155/2019/1046504)
Supplement: Supplementary 2 — Supplementary Material S2: the complete list of identified peptides coming from the two most active fractions from the first chromatographic dimension, with sequence and related data, was reported. [file 1046504.f2.xlsx]

## Sheet: all identified peptides
Sequence	# PSMs	# Protein Groups	Protein Group Accessions	MH+ [Da]	FR8 Area	FR12 Area	IonScore FR8	IonScore FR12	m/z [Da] FR8	RT FR8	m/z [Da] FR12	RT FR12	q-Value
AAAKALQIL	1	0		898.564	0	0		40.67			898.564	93.9747	0.85041
ADLAHLPF	2	1	P48438	883.469	0	303879736		52.27			442.238	67.0963	0.016265
AEEGIVVGGGCILL	1	0		1329.71	0	12430319		41.47			665.361	89.4428	0.538351
AFKDDDVPDLTKL	1	1	A0A0D3BQ40	1476.76	0	199781267		53.35			738.884	63.1527	0
AFYDYIGNNPAKGGLFR	1	1	A0A0D3BK57	1902.96	0	7.89662e+07		49.24			951.982	69.2956	0
AGITDEDAAKVVDGL	1	1	A0A0D3D2A0	1473.75	0	6.7584e+07		59.38			737.377	68.4073	0
AGRNIPFPDGVLIN	1	1	A0A0D3A520	1482.81	0	3.14059e+07		45.29			741.909	68.7464	0.030566
AHVTDPKVIDLL	1	1	A0A0D3CKW6	1320.76	0	6.05928e+07		45.15			660.881	58.7958	0
AHYDQVLDTT	1	1	A0A0D3AJM6	1162.54	51348971	0	75		1162.54	45.6906			0.562978
AIADIIFGA	2	0		890.501	0	0		43.28			890.501	90.8803	0.901667
AKVINDRFGIVE	1	1	I3RXT6	1360.76	0	79179020		49.41			680.885	49.8708	0
AKVINDRFGIVEGL	1	1	I3RXT6	1530.87	0	5.3679e+08		55.85			765.937	60.6898	0
ANILLPKPGYPSNLIR	2	1	A0A0D3BL41	1766.04	0	0		54.36			883.522	60.3185	0
ANVKLDLSLGISL	1	0		1342.8	0	2.10264e+07		48.21			1342.8	75.0011
APGVQTPVIVRF	1	1	A0A0D3CBU1	1283.75	0	1.23671e+08		41.41			642.378	63.0531	0.019676
AQGRTDPNQNTGIVIQ	1	1	A0A0D2ZZ69	1711.88	480931706	0	60.78		856.442	43.1223			0
AQVVVA	1	0		586.357	0	0	44.75		586.357	63.3695			0.790388
AVTFPVRPGFGKL	1	1	A0A0D3BUB9	1388.81	0	56881396		44.19			694.908	58.6701	0.019676
CRPKTGSSGGILK	1	0		1303.7	0	5.09459e+07		45.87			652.355	67.8107	0.418056
DDLKLPTDDNLSAL	1	1	A0A0D3BHZ5	1529.77	0	2.14604e+07		46.09			765.391	75.7374	0.003589
DFGVSL	1	0		637.321	0	1.31331e+08		41.85			637.321	64.1122	0.564357
DFIAFI	3	0		725.39	0	0		40.71			725.39	103.007	0.546223
DFSGDIDGGVR	1	1	A0A0D3ANQ7	1137.52	8.68087e+06	0	44.03		569.263	53.8422			0
DGVTLLALNLAG	1	0		1156.65	0	1.63525e+07		42.07			1156.65	69.3946
DIHSPRIPSTEE	1	1	A0A0D3AJM6	1380.68	3.08889e+08	0	40.28		690.844	42.1696			0.046268
DKEGIPPDQQRLIF	1	1	A0A0D3BEK5	1655.88	0	62427252		47.19			828.444	57.763	0
DKLNLILL	1	0		941.605	0	4.40383e+07		40.35			941.605	70.4748	0.393596
DSNPSNPKPRFGAY	1	1	A0A0D3CTH4	1549.74	1.38059e+08	0	41.43		775.375	42.5908			0.519174
DVTKIWPEDILPLQPVGRL	5	1	A0A0D3CBU1	2189.24	0	0		60.67			1095.12	95.0532	0
DWVSLPGVLPVAS	1	1	P48686	1339.73	0	0		62.88			670.369	97.9289	0
EEGKLDDNIVK	1	0		1259.64	0	8320765		46.46			1259.64	75.3875	0.967908
EFKEDVADYA	1	0		1186.53	3.30402e+07	0	40.27		1186.53	49.0858			0.361978
EIRSKLLSL	1	0		1058.65	0	375972295		49.14			529.827	64.5403	0.440422
EIVTGKKPTEGVF	1	0		1404.78	0	8.55241e+07		42.67			702.892	51.8924	0.697036
ELAPYDPDWYYIR	1	1	A0A0D3AG29	1700.8	0	3.60904e+07		52.35			850.904	79.2629	0
ELGVLV	3	0		629.388	0	0		40.99			629.388	60.7312	0.874383
EQFLPL	1	0		746.411	0	0		40.08			746.411	75.5192	0.601652
ESGWPTQGGPGASVPNAE	1	1	A4USG1	1740.79	2.10413e+06	0	44.59		870.898	64.6655			0
ESVVAI	2	0		617.352	0	4.0949e+07		40.17			617.352	59.1667	0.808184
ETGKDGPGKVGPL	1	1	A0A0D3CQ47	1254.67	81811911	0	42.02		627.84	36.9408			0
EVLALIQL	1	0		898.564	0	0		40.82			898.564	93.9747	0.863644
EVLNVESNII	1	0		1129.61	0	3.30355e+08		50.35			565.31	59.3764	0.74544
FAPIPTPGGGGSKPGGSGNESGGGGGGSKPGGSGNE	1	1	A0A0D3CQ47	3026.39	2.66128e+08	0	44.09		1009.47	42.6738			0
FDGVSL	1	0		637.321	0	1.31331e+08		41.85			637.321	64.1122	0.564357
FDMTVDGK	1	0		912.416	1.19508e+07	0	43.9		912.416	46.0208			0.795737
FDMTVGDK	1	0		912.416	1.19508e+07	0	44.15		912.416	46.0208			0.617996
FDTGSQGGDGGDVPSKD	1	1	A0A0D3CQ47	1638.69	0	3.3958e+06		57.94			819.85	40.9051	0
FHWDLPQTL	1	1	Q1W0X8	1156.58	0	2.5927e+07		45.16			1156.58	78.8819	0.029041
FIDIIKAA	1	1	A0A0D3BXQ9	890.537	0	5.74231e+07		40.56			890.537	58.9553	0.147815
FIDLDTTL	1	1	A0A0H3Y304	937.491	0	2.4595e+07		44.36			937.491	80.1692	0.348775
FKDENGGKLIGF	1	1	A0A0D3CQ47	1324.69	0	452311911		42.12			662.85	52.5438	0
FKEEDGIDYA	1	0		1186.53	3.30402e+07	0	40.27		1186.53	49.0858			0.056842
FLDVIL	4	0		719.436	0	0		41.43			719.436	94.7987	0.902863
FLSDKLKPF	1	1	A0A0D3ED69	1094.63	0	2.04113e+08		45.05			365.547	55.4664	0.003589
FLTLPNIKVPLIL	1	1	M1F2H2	1480.96	0	6.53183e+06		50.48			740.983	107.9	0.042787
FLVGLLT	1	0		762.477	0	5.56663e+07		44.66			381.742	55.1021	0.740999
FPQLPLSLEI	1	0		1156.65	0	1.63525e+07		49.22			1156.65	69.3946	0.26329
FQNVKLS	1	1	A0A0D3EF89	835.47	4.04478e+07	0	51.81		835.47	39.764			0.242
FSGYVPNPVLVIIDVQPK	1	1	A0A0D3AHX2	1985.12	0	0		41.8			993.063	101.285	0
FSLAPLVPRL	1	1	A0A0D3AE60	1112.68	0	0		51.28			556.846	82.5793	0.003589
FVDLEPTVIDEVRTG	1	1	A0A0D2ZXL5	1689.87	0	36665299		48.84			845.441	74.0301	0
GAELIDSVLDVVRKE	1	1	A0A0D3D8X0	1642.91	0	0		49.9			821.957	87.1044	0
GANPVLITR	1	0		940.56	415491511	0	44.84		470.783	40.2838			0.193628
GATVRDLLIK	1	0		1085.66	0	4.24013e+08		41.64			543.333	54.3276
GAVEGINKIVTGDLISL	1	1	A0A0D3CNU8	1698.97	0	3.8664e+06		40.64			849.989	89.585	0
GDSNPSNPKPRFGAY	1	1	A0A0D3CTH4	1606.77	2.22532e+08	0	54.41		803.887	40.6746			0
GEAFLPL	1	0		746.411	0	0		40.08			746.411	75.5192	0.512619
GGLHLIGL	1	0		779.479	0	5.80033e+08		45.91			390.243	61.7629
GGLIHAVL	1	0		779.479	0	5.80033e+08		44.05			390.243	61.7629
GGLIHIGL	1	1	A0A0D3DLY0	779.479	0	5.80033e+08		61.47			390.243	61.7629	0
GINKIVTGDLISL	2	1	A0A0D3CNU8	1342.8	0	5.26848e+08		81.33			1342.8	75.0011	0
GINKIVTGELVSL	1	0		1342.8	0	2.10264e+07		48.03			1342.8	75.0011
GKFSSIVPVVTL	1	2	A0A0D3BL43;A0A0D3BL41	1246.74	0	19117723		44.27			1246.74	73.3598	0.032354
GLQFPVGRIA	1	2	A0A0D3DD18;A0A0D3AXA2	1057.62	0	2.37733e+08		40.56			529.312	61.2783	0.003589
GLTDQDIVAL	1	0		1044.56	0	2.69802e+07		42.7			1044.56	75.1757	0.145211
GNIFDGIQRPL	1	0		1229.67	0	238077512		43.81			615.336	67.7381	0.15804
GNIIVGDDGTAT	1	0		1132.55	1.99313e+07	0	43.43		1132.55	49.7686			0.478058
GNRLLPGFLDSIL	1	0		1414.81	0	0		43.69			707.908	103.486	0.063814
GNTGDQWSDLQ	1	1	A0A0D3A3J0	1220.52	0	0	45.05		610.764	62.0039			0
GPVIDDVKLI	2	1	A0A0D3AXN1	1068.63	0	116603307		45.85			534.819	66.906	0
GPVVDIDGDIIFH	1	1	A0A0D3D0C0	1396.71	0	0		47.63			698.861	80.2841	0
GQYGYGGYFPNRPTTS	1	1	A0A0D2ZUP3	1764.8	4.80349e+06	0	48.2		882.904	67.4382			0.037162
GRTDPNQNTGIVIQ	1	1	A0A0D2ZZ69	1512.78	5.62605e+08	0	46.94		756.893	43.221			0.078943
GTPKDSLNLNQQVR	1	1	A0A0D3CQU2	1569.84	9.20056e+07	0	56.88		785.423	40.6952			0.037162
GVLIPPFIEDDHSPLPGW	1	1	A0A0D3AXN1	1989.02	0	0		42.48			995.012	103.5	0
GVQFYHDLIDELLKNKITPL	1	1	A0A0D3CRC8	2356.3	0	3.06356e+06		48.76			786.105	107.768	0
GYNPSYGARPL	1	1	A0A0D3B420	1194.59	9.22849e+07	0	40.38		597.8	46.572			0
HIPVLAPLPIGF	1	0		1273.77	0	0		45.93			637.389	90.9424
HSNILL	3	0		696.405	0	2.13825e+07		41.24			696.405	49.0537	0.864613
HVAEDVLKL	1	1	A0A0D2ZT49	1023.58	0	2.0145e+08		40.91			512.296	50.0787	0.016265
HVNISPNPVGPDVGEL	1	1	A0A0D3AHF7	1643.84	0	1.18164e+08		49.09			822.426	60.3781	0
HVPILAPLPIGF	1	1	F2X5J8	1273.77	0	0		62.11			637.389	90.9424	0.032354
HWDIPQTL	2	1	Q1W0X8	1009.51	0	86933694		51.23			1009.51	65.783	0.029041
HWDTPQDLEDEYGGFL	1	1	A0A0D3CRC8	1921.83	0	0		63.04			961.419	93.0836	0
HYSDEDVIRIL	1	1	A0A0D3CGB8	1359.69	0	9.10379e+08		44.79			680.351	61.6384	0
IAAPPVDIDGIREPVSGSL	2	1	A0A0H3XZM8	1906.03	0	2.05564e+07		47.66			953.519	71.2634	0
IAIDTILNQK	1	1	A0A0D2ZQE9	1128.66	0	9.95515e+07		52.44			564.836	61.173	0
IDAPIISPGLL	1	1	A0A0D3BQ40	1108.67	0	0		43.09			1108.67	88.211	0.030566
IDEPSFTQPK	1	1	A0A0D3BEN2	1161.58	6.01781e+07	0	54.13		581.294	47.1048			0
IDNIFRF	1	2	A0A0H3Y304;A0A0D3EGT1	924.495	0	1.26427e+08		44.98			462.751	71.7202	0.142255
IDSNLKTNGIVEI	1	0		1415.77	0	7.15183e+06		40.48			708.386	72.5738	0.85041
IEGVIV	2	0		629.388	0	0		40.99			629.388	60.7312	0.846876
IFGPILPIITL	3	1	A0A0D3CNK9	1196.77	0	2.86735e+06		50.63			1196.77	108.338	0.003589
IHNLLGI	1	0		779.48	0	2.65548e+08		47.77			779.48	61.7104	0.878854
IIDSVLDIVRKE	1	1	A0A0D3AT87	1399.82	0	1.29856e+08		54.63			467.278	71.7363	0.003589
IKIPF	4	0		617.403	0	34081720		40.04			309.205	59.5727	0.784129
IKKVVDLQEE	1	2	A0A0D3AJM6;A0A0D3EEL1	1200.69	1391243403	0	40.09		600.847	37.5289			0
IKLGIT	5	0		644.435	0	9.25729e+06		42.43			644.435	47.9858	0.950654
ILKEDDIVGIL	2	1	A0A0D3D4U0	1227.72	0	8.87236e+07		42.86			614.365	79.7992	0.016265
ILLPKPGYPSNLIR	1	1	A0A0D3BL41	1580.96	0	1.96603e+08		41.46			790.982	58.6385	0.111738
IPYITAG	1	0		734.41	0	0	41.79		734.41	58.8711			0.743091
IQDKEGIPPDQQRL	1	1	A0A0D3BEK5	1636.87	211694133	0	66.67		818.939	39.4483			0.04305
IRSNILIL	1	0		941.605	0	4.40383e+07		40.35			941.605	70.4748	0.3154
ITFNFPTIDKL	2	1	P48686	1308.72	0	0		65.53			654.866	86.3657	0
ITLRPSPPPPQ	1	1	A0A0D3A271	1202.69	1.68936e+08	0	66.94		601.849	42.8735			0.037162
IVETPDELRSA	1	1	A0A0D3EET1	1229.64	0	0	46.43		615.324	47.1539			0
IVIHNPGEEED	1	1	A0A0D3AXN1	1251.59	0	2.70501e+07		44.46			626.298	44.8691	0.016265
KATTHPVVSDKL	1	0		1295.74	2.93366e+07	0	43.89		648.371	34.6852			0.569089
KDLFDIM	1	0		881.446	0	1.66784e+07		40.45			441.226	76.1876	0.240702
KEPAIIIGGKL	1	1	A0A0D2ZQT1	1138.72	0	26970459		40.15			569.865	50.4963	0.019676
KGALDGGLDIPHSDKRFAGF	1	1	A0A0D3BDA5	2101.09	0	1.29975e+08		42.84			701.034	58.118	0
KIEDDLKVR	1	1	A0A0D3DPE1	1115.65	149918792	0	46.62		372.553	36.7423			0.032586
KIIAGPAEKPMIVV	1	1	A0A0D3AEW4	1465.89	0	230277101		44			733.446	52.1984	0
KIIGIT	5	0		644.435	0	9.25729e+06		42.43			644.435	47.9858	0.950654
KIKDKHYSDEDVIRIL	2	1	A0A0D3CGB8	1972.09	0	339991460		68.79			986.55	49.3646	0
KLELPDGPVTF	1	1	A0A0D3CXY3	1215.67	0	227415447		44.65			608.336	71.0777	0
KLKDRFYIQPL	1	1	A0A0D3E811	1420.83	0	2.08398e+08		42.15			710.921	51.5941	0.003589
KLSNPSFGDL	1	1	A0A0D3D8X0	1077.56	0	73916206		47.9			539.283	55.2862	0.063814
KLTGKLRDGMTAT	1	1	A0A0D3A1P0	1391.77	7.03591e+07	0	40.66		696.39	35.1514			0
KNIEDILLK	2	1	A0A0D3CHB3	1085.66	0	4.24013e+08		50.17			543.333	54.3276	0.033407
KPEGTSLLKL	1	0		1085.66	0	4.24013e+08		41.08			543.333	54.3276
KTFQGPPHGIQVE	1	1	P48686	1437.75	178258315	0	40.32		719.38	43.039			0
KVVDIVDTF	1	0		1035.58	0	120871943		48.33			1035.58	64.3699	0.125901
KVVKGDDVIVE	1	0		1200.69	3.24776e+07	0	46.27		600.846	36.039			0.653498
KWAGGKPEKPILR	1	0		1479.88	5.91391e+07	0	51.52		370.726	34.7973			0.919822
KYLNNLL	1	0		877.506	0	0		45.73			877.506	96.2106	0.934416
LAATINIIPLE	1	0		1167.7	0	0		41.37			1167.7	103.63	0.963641
LARNPFGQVPAFEDGDLKLF	1	1	U6BF50	2234.16	0	2.26208e+06		43.88			1117.58	89.7732	0
LARPVIGGL	1	2	A0A0D3CVH2;A0A0D3CXY3	895.574	0	7.66491e+08		52.48			448.291	52.6807	0.141525
LDDPVFRPL	1	1	Q8W3J5	1071.59	0	1.18687e+08		40.85			536.296	63.0415	0.12511
LDIVIPTIR	1	1	A0A0D3EF89	1039.65	0	0		45.97			520.33	70.5718	0.116004
LDKLNLIL	1	0		941.605	0	4.40383e+07		40.2			941.605	70.4748	0.438625
LDVGLIR	1	1	A0A0D3BDA5	785.489	0	175229428		41.18			393.248	52.3463	0.185952
LFDEQTDEYKE	1	1	A0A0D2ZW65	1416.62	5.10697e+07	0	50.36		708.814	50.8069			0
LFDVLL	2	0		719.436	0	0		41.43			719.436	94.7987	0.889624
LFIDNIFRFT	2	1	A0A0D3EGT1	1285.7	0	0		42.27			643.353	102.506	0
LHPIVSPISDF	1	1	A0A0D3AZA1	1224.67	0	0		42.07			612.836	67.1729	0.063814
LHPIVSPISDFE	1	1	A0A0D3AZA1	1353.71	0	364960671		43.77			677.358	67.3151	0
LIDAVLDVVRKE	1	1	F8U7Z8	1369.81	0	8.2635e+07		40.6			685.408	65.5513	0
LIDSVLDVVRKE	1	1	A0A0D3D8X0	1385.8	0	446352404		40.32			693.404	63.2163	0
LILHNGL	1	0		779.479	0	5.80033e+08		47.1			390.243	61.7629
LKDINLIL	1	0		941.605	0	4.40383e+07		40.2			941.605	70.4748	0.712313
LLDALIQL	1	0		898.564	0	0		40.82			898.564	93.9747	0.863644
LLFFIDPLPI	1	0		1187.72	0	1.00497e+09		43.89			594.362	55.5409	0.813463
LNEDELRDA	1	0		1074.51	92807094	0	55.34		537.758	43.6166			0.562978
LNNALKIL	1	0		898.564	0	0		40.67			898.564	93.9747	0.864401
LPYLTQ	2	0		734.41	0	0	41.79		734.41	58.8711			0.845219
LQMLIVILP	1	1	A0A0D3BUB9	1039.65	0	0		40.89			520.33	70.5718
LSDEQVRKL	1	0		1087.61	363299188	0	45.96		544.31	37.0099			0.056842
LSLVEDILDRA	1	1	A0A0D3CNC4	1243.69	0	0		73.9			622.35	93.3365	0
MLKKDKL	1	0		875.537	0	0		41.6			438.272	78.9007	0.430794
NFLTLPNIKVPLIL	1	1	M1F2H2	1595	0	3.65719e+06		57.47			798.002	108.003	0.003589
NKVVDLPQE	1	0		1041.56	208759113	0	43.13		521.283	42.6663			0.316292
NLAFDRDLIGPA	1	1	A0A0D3EF89	1301.69	0	1.44355e+08		48.38			651.347	67.0885	0
NLVLLPGIAF	1	1	A0A0D3BL43	1056.65	0	6.75589e+06		49.94			528.827	108.019	0
NLVVLPG	1	2	A0A0D3BL43;A0A0D3BL41	711.442	0	89960734		49.38			711.442	61.2006	0.451826
NTLLPSPF	1	1	A0A0D3B5L9	888.485	0	0		45.79			888.485	80.7135	0.019676
NTVGIPVNPTPL	1	1	A0A0D3EF89	1221.69	0	60477103		54.17			1221.69	66.4134	0
PDSITWR	1	0		874.443	2.87086e+07	0	43.67		437.725	47.0444			0.821772
PEGTGGFIEPR	1	1	A0A0D3BVE4	1159.58	1.80443e+08	0	48.14		580.292	44.4063			0
PIYITQ	4	0		734.41	0	0	41.79		734.41	58.8711			0.867991
PLKDTSGPSLN	1	1	A0A0D3D208	1128.59	0	3.57755e+06		63.49			564.8	43.3158	0.014123
PLMDLLNI	1	0		928.519	0	0		44.02			928.519	89.1215	0.584263
PQIAVI	2	0		640.404	0	1.66958e+08		42.19			640.404	59.1632	0.934416
PRTGEVIAQ	1	0		970.534	0	1.3023e+06		40.54			485.771	38.1387	0.054775
PTRNIAIGGVQEE	1	1	A0A0D2ZPE6	1383.72	1.95981e+08	0	53.57		692.366	44.3832			0
PYTAVI	1	0		663.372	0	347344		42.42			663.372	117.459	0.85041
QAVVVA	1	0		586.357	0	0	44.75		586.357	63.3695			0.790388
QIIGPVLDVAFPPGKMPNIY	1	1	A0A0H3Y304	2169.18	0	0		53.23			1085.09	95.316	0
QPLAVL	1	0		640.404	0	1.66958e+08		42.19			640.404	59.1632	0.934416
QVVKIGL	1	0		756.5	0	8.95492e+07		41.69			756.5	54.5963	0.53284
RDDGILL	1	0		801.449	0	4.77138e+07		41.83			801.449	54.5125	0.940466
RDNIQGITKPAIR	1	1	A0A0D3B2L1	1481.86	138400393	0	49		741.433	37.6065			0
REDIDIA	1	0		831.412	0	1.13685e+07		52.43			831.412	78.8686	0.839014
REPGPVKGGGSVIAF	1	1	Q39366	1470.81	0	376145101		58.72			735.909	49.5958	0
RGEELVSGGLL	1	0		1129.61	0	3.30355e+08		42.41			565.31	59.3764
RIADDDVVLIK	1	1	A0A0D3AC56	1256.72	0	2.78496e+07		46.73			628.864	49.0456	0.003589
RIGGGPLGEGLDPLYPGGAFDPL	1	1	A0A0D3BDG0	2268.18	0	0		45.8			1134.6	98.0648	0
RLADTVLDATPVVIF	1	1	A0A0D3BQ40	1629.93	0	0		57.2			815.467	90.907	0
RQVIDIIPR	1	1	A0A0D2ZXA0	1109.68	0	1.10688e+08		53.26			555.344	50.1551	0
RSIGKNVSPIEVK	1	1	A0A0D3E051	1426.84	61296571	0	57.47		713.924	36.0112			0
RVKLPHLIR	1	1	A0A0D3A124	1131.75	0	1.26557e+07		64.85			377.922	46.061	0.030566
RVNENQNKPVTF	1	0		1445.75	164108426	0	41.46		723.38	36.3706			0.902676
RWVFPDTKSGIIVL	1	1	A0A0D3AME4	1630.94	0	0		41.65			815.973	77.6948	0.046676
SDKDYKEPPPAPL	1	1	F2X5J8	1456.74	4.33716e+08	0	41.22		728.872	40.9694			0.292084
SDPEGTGGFIEPR	1	1	A0A0D3BVE4	1361.63	1.5185e+07	0	45.22		681.321	48.7287			0
SEVVAI	2	0		617.352	0	4.0949e+07		40.17			617.352	59.1667	0.954907
SFDTPVYRF	1	1	A0A0D3DPE1	1131.55	0	6.50625e+07		40.69			566.278	63.7116	0.21823
SGGGGGGSGNETGKDGPGKVGPL	2	1	A0A0D3CQ47	1941.93	3.13924e+08	0	45.56		971.47	37.4065			0
SGGVLPNINPVLLPK	1	1	A0A0D3AXA2	1517.91	0	267742336		54.48			759.458	71.2763	0
SHNIIL	3	1	A0A0D3CRC8	696.405	0	2.13825e+07		41.24			696.405	49.0537	0.864613
SIDMDTPTLEDAFDRL	1	1	A0A0D3BL43	1838.85	0	0		47.92			919.93	91.9417	0
SIEDLFDVGINLPKDA	1	1	A0A0D3CVH2	1745.9	0	0		42.69			873.454	97.5785	0
SIGLPLALCL	1	0		999.601	0	1.85089e+08		44.03			500.304	65.9499	0.915062
SIWYGPDRPKYLGPF	2	1	A0A0D3BDG0	1795.92	0	0		45.76			898.464	70.8917	0
SKGFTSPLFGID	1	1	A0A0D3CQ47	1268.66	0	3.8763e+08		53.36			634.831	72.0499	0
SKGFTSPLFGIN	1	1	A0A0D3CQ47	1267.67	0	180065808		41.21			634.339	68.2585	0.22408
SLIGEIITGK	1	0		1030.62	0	1.9975e+08		43.16			515.812	74.587	0.063814
SLLPKILPVYKE	1	1	A0A0D3EEL1	1399.86	0	4.40998e+08		41.93			467.291	62.9025	0
SLPPSLSPIYKL	1	1	A0A0D3B5V1	1314.77	0	28402732		45.83			1314.77	68.4201	0
SLRNLILL	1	0		941.605	0	4.40383e+07		40.35			941.605	70.4748	0.434288
SLTTGNAGGRL	1	1	A0A0D3C2I5	1046.56	9.75965e+07	0	42.6		523.784	38.5188			0.028171
SLVEDILDRA	1	1	A0A0D3CNC4	1130.61	0	24555606		40.37			565.807	85.1719	0.024582
SPVETSVPVVE	1	0		1142.6	5.53008e+08	0	43.43		571.802	41.0969			0.846829
SSDVYDKL	1	1	A0A0D2ZUP3	926.45	3.05139e+07	0	41.01		926.45	45.1479			0.845219
SSKAGLQFPVGRIA	1	1	A0A0D3DD18	1430.82	0	66194360		40.51			715.911	52.8737	0
SSRGPNHITPVILKPDVIAPGVN	1	1	A0A0D3CKD7	2381.34	0	5.52849e+07		68.89			794.45	54.6242	0
STGDVLPIKRGPQ	1	1	A0A0D3BMM4	1367.77	1.68929e+08	0	44.2		684.388	39.5136			0.028171
SVEDIIDLIGN	1	1	A0A0D3CYU7	1187.62	0	0		48.52			1187.62	99.3544	0.195459
SVEDIIDLIGNR	1	1	A0A0D3CYU7	1343.72	0	0		48.64			672.364	91.5232	0.040928
SVKALPGLPVSF	2	1	Q8H0E7	1214.72	0	96570217		51.55			1214.72	72.8658	0
SVPGSQPGFSEFPKFL	1	1	A0A0D3AJV1	1723.87	0	0		49.47			862.44	82.6322	0
TAILKPDNEVRIL	1	1	A0A0D3BG01	1481.87	0	47937089		48.91			741.44	54.2344	0.003589
TDVVAI	2	0		617.352	0	4.0949e+07		40.17			617.352	59.1667	0.954907
TERGADIVAL	1	0		1044.56	0	2.69802e+07		42.7			1044.56	75.1757	0.120996
TFGDSNFDAGNR	1	1	A0A0D3CQU2	1300.56	4.95891e+08	0	54.03		650.783	46.9477			0
TGKDGPGKVGPL	1	1	A0A0D3CQ47	1125.63	227761726	0	46.64		563.318	36.0587			0
TVGTVGAGRIGKLL	1	1	A0A0D3EFG5	1341.82	0	8.64202e+07		40.49			671.416	52.3498	0.003589
VADDLDIA	1	0		831.412	0	1.13685e+07		52.43			831.412	78.8686	0.36166
VDFYHRY	1	1	A0A0D3CRC8	999.47	1.83555e+09	0	42.05		500.239	44.077			0.944242
VDLDNEDYGKPV	1	1	A0A0D3ED69	1363.64	2.66683e+07	0	70.6		682.324	50.9358			0
VDLIVDVPVL	1	1	A0A0D3C666	1081.65	0	0		61.26			1081.65	100.233	0
VDPISILLA	1	0		940.574	0	23184412		40.46			940.574	71.7934	0.380137
VELGKEVDYLL	1	0		1277.7	0	1.1385e+08		47.08			639.356	74.65	0.063814
VETIANLLQ	1	0		1000.57	0	2.78084e+07		40.96			1000.57	74.8748	0.85041
VGDFHRTL	1	0		944.497	5.1021e+07	0	43.71		472.752	37.4875			0.445008
VIGSTPPFGYPF	1	1	A0A0D3AGD2	1281.66	0	0		41.93			641.331	90.113	0
VKDPDGYTFE	1	1	Q39366	1170.53	0	0	49.81		585.771	49.1636			0
VKNPNPVPIPL	2	1	A0A0D3C666	1187.72	0	1.00497e+09		43.93			594.362	55.5409	0
VKVLGDPL	1	0		840.521	0	739550350		44.28			420.764	51.1416
VPIPVPLPF	6	1	A0A0D3E2V2	978.606	0	0		54.67			978.607	98.7568	0.019676
VQITGLPL	1	0		840.521	0	739550350		44.48			420.764	51.1416
VQKPLEDITDSL	1	1	A0A0D3CND6	1357.72	0	7.07286e+07		54.24			679.366	66.1957	0.003589
VQVATIPL	2	0		840.521	0	739550350		62.46			420.764	51.1416	0.24672
VQVVIPG	1	0		711.442	0	89960734		49.38			711.442	61.2006	0.670878
VSDKALLDDPVFRPL	1	1	Q8W3J5	1684.93	0	1.21206e+07		40.1			842.969	69.1558	0
VSSILVQISL	1	0		1058.65	0	1.49776e+08		45.32			1058.65	64.5777	0.145211
VTKSKPETGEVIGVF	1	1	A0A0D3AYU0	1590.88	0	8.00821e+07		40.53			795.943	50.8633	0
VTNDVAKTL	1	1	A0A0D2ZQT1	960.538	1.46643e+09	0	54.76		480.773	38.304			0.078943
VVDALRPVTDLPLDVH	1	1	A0A0D3DDK7	1758.98	0	2.16529e+08		50.5			879.995	67.1215	0
VVVSPPYVFLPL	1	1	A0A0D3BXQ9	1329.79	0	1.26389e+07		59.91			665.396	108.028	0
VYNDVGDPDKD	1	2	A0A0D3CVH2;A0A0D3CXY3	1236.54	0	1.22643e+06		42.79			618.774	40.0099	0
WDDGVYDGVR	1	1	A0A0D3B5V1	1181.52	8.66971e+06	0	58.48		591.266	56.7763			0
WLGAPQLIDTNDEAKTL	1	1	A0A0D2ZQT0	1884.98	0	2.33649e+07		66.58			942.991	74.9719	0
WYADFLKPGFPT	1	1	A0A0D3CRC8	1441.72	0	0		54.6			721.363	85.1572	0
YANTGPLPSHGFVRQ	1	1	A0A0D3A6F6	1643.83	5.18174e+07	0	48.15		822.421	46.9275			0
YDYIGNNPAKGGLF	1	1	A0A0D3BK57	1528.75	0	103938449		55.85			764.878	66.4847	0
YHFDKGFGS	1	0		1057.48	2.0658e+07	0	48.7		1057.48	45.4963			0.24755
YPTAVI	1	0		663.372	0	347344		42.42			663.372	117.459	0.85041
YQIIDLL	2	0		877.506	0	0		45.73			877.506	96.2106	0.125901
YTPESPGDATRNL	1	1	A0A0D2ZW65	1420.67	0	0	40.48		710.841	48.7762			0
YYHIVNPL	1	0		1018.54	0	6.94112e+07		45.75			1018.54	58.3222	0.147815
YYVIPVIRGPEGGGL	4	1	A0A0D3D0C0	1589.87	0	0		47.12			795.44	74.4961	0

## Sheet: Area> 1E7
Sequence	# PSMs	# Protein Groups	Protein Group Accessions	MH+ [Da]	FR8 Area	FR12 Area	IonScore FR8	IonScore FR12	m/z [Da] FR8	RT FR8	m/z [Da] FR12	RT FR12	q-Value
LLFFIDPLPI	1	0		1187.72	0	1.00497e+09		43.89			594.362	55.5409	0.813463
VKNPNPVPIPL	2	1	A0A0D3C666	1187.72	0	1.00497e+09		43.93			594.362	55.5409	0
HYSDEDVIRIL	1	1	A0A0D3CGB8	1359.69	0	9.10379e+08		44.79			680.351	61.6384	0
LARPVIGGL	1	2	A0A0D3CVH2;A0A0D3CXY3	895.574	0	7.66491e+08		52.48			448.291	52.6807	0.141525
VKVLGDPL	1	0		840.521	0	739550350		44.28			420.764	51.1416
VQITGLPL	1	0		840.521	0	739550350		44.48			420.764	51.1416
VQVATIPL	2	0		840.521	0	739550350		62.46			420.764	51.1416	0.24672
GGLHLIGL	1	0		779.479	0	5.80033e+08		45.91			390.243	61.7629
GGLIHAVL	1	0		779.479	0	5.80033e+08		44.05			390.243	61.7629
GGLIHIGL	1	1	A0A0D3DLY0	779.479	0	5.80033e+08		61.47			390.243	61.7629	0
LILHNGL	1	0		779.479	0	5.80033e+08		47.1			390.243	61.7629
AKVINDRFGIVEGL	1	1	I3RXT6	1530.87	0	5.3679e+08		55.85			765.937	60.6898	0
GINKIVTGDLISL	2	1	A0A0D3CNU8	1342.8	0	5.26848e+08		81.33			1342.8	75.0011	0
FKDENGGKLIGF	1	1	A0A0D3CQ47	1324.69	0	452311911		42.12			662.85	52.5438	0
LIDSVLDVVRKE	1	1	A0A0D3D8X0	1385.8	0	446352404		40.32			693.404	63.2163	0
SLLPKILPVYKE	1	1	A0A0D3EEL1	1399.86	0	4.40998e+08		41.93			467.291	62.9025	0
GATVRDLLIK	1	0		1085.66	0	4.24013e+08		41.64			543.333	54.3276
KNIEDILLK	2	1	A0A0D3CHB3	1085.66	0	4.24013e+08		50.17			543.333	54.3276	0.033407
KPEGTSLLKL	1	0		1085.66	0	4.24013e+08		41.08			543.333	54.3276
SKGFTSPLFGID	1	1	A0A0D3CQ47	1268.66	0	3.8763e+08		53.36			634.831	72.0499	0
REPGPVKGGGSVIAF	1	1	Q39366	1470.81	0	376145101		58.72			735.909	49.5958	0
EIRSKLLSL	1	0		1058.65	0	375972295		49.14			529.827	64.5403	0.440422
LHPIVSPISDFE	1	1	A0A0D3AZA1	1353.71	0	364960671		43.77			677.358	67.3151	0
KIKDKHYSDEDVIRIL	2	1	A0A0D3CGB8	1972.09	0	339991460		68.79			986.55	49.3646	0
EVLNVESNII	1	0		1129.61	0	3.30355e+08		50.35			565.31	59.3764	0.74544
RGEELVSGGLL	1	0		1129.61	0	3.30355e+08		42.41			565.31	59.3764
ADLAHLPF	2	1	P48438	883.469	0	303879736		52.27			442.238	67.0963	0.016265
SGGVLPNINPVLLPK	1	1	A0A0D3AXA2	1517.91	0	267742336		54.48			759.458	71.2763	0
IHNLLGI	1	0		779.48	0	2.65548e+08		47.77			779.48	61.7104	0.878854
GNIFDGIQRPL	1	0		1229.67	0	238077512		43.81			615.336	67.7381	0.15804
GLQFPVGRIA	1	2	A0A0D3DD18;A0A0D3AXA2	1057.62	0	2.37733e+08		40.56			529.312	61.2783	0.003589
KIIAGPAEKPMIVV	1	1	A0A0D3AEW4	1465.89	0	230277101		44			733.446	52.1984	0
KLELPDGPVTF	1	1	A0A0D3CXY3	1215.67	0	227415447		44.65			608.336	71.0777	0
VVDALRPVTDLPLDVH	1	1	A0A0D3DDK7	1758.98	0	2.16529e+08		50.5			879.995	67.1215	0
KLKDRFYIQPL	1	1	A0A0D3E811	1420.83	0	2.08398e+08		42.15			710.921	51.5941	0.003589
FLSDKLKPF	1	1	A0A0D3ED69	1094.63	0	2.04113e+08		45.05			365.547	55.4664	0.003589
HVAEDVLKL	1	1	A0A0D2ZT49	1023.58	0	2.0145e+08		40.91			512.296	50.0787	0.016265
AFKDDDVPDLTKL	1	1	A0A0D3BQ40	1476.76	0	199781267		53.35			738.884	63.1527	0
SLIGEIITGK	1	0		1030.62	0	1.9975e+08		43.16			515.812	74.587	0.063814
ILLPKPGYPSNLIR	1	1	A0A0D3BL41	1580.96	0	1.96603e+08		41.46			790.982	58.6385	0.111738
SIGLPLALCL	1	0		999.601	0	1.85089e+08		44.03			500.304	65.9499	0.915062
SKGFTSPLFGIN	1	1	A0A0D3CQ47	1267.67	0	180065808		41.21			634.339	68.2585	0.22408
LDVGLIR	1	1	A0A0D3BDA5	785.489	0	175229428		41.18			393.248	52.3463	0.185952
PQIAVI	2	0		640.404	0	1.66958e+08		42.19			640.404	59.1632	0.934416
QPLAVL	1	0		640.404	0	1.66958e+08		42.19			640.404	59.1632	0.934416
VSSILVQISL	1	0		1058.65	0	1.49776e+08		45.32			1058.65	64.5777	0.145211
NLAFDRDLIGPA	1	1	A0A0D3EF89	1301.69	0	1.44355e+08		48.38			651.347	67.0885	0
DFGVSL	1	0		637.321	0	1.31331e+08		41.85			637.321	64.1122	0.564357
FDGVSL	1	0		637.321	0	1.31331e+08		41.85			637.321	64.1122	0.564357
KGALDGGLDIPHSDKRFAGF	1	1	A0A0D3BDA5	2101.09	0	1.29975e+08		42.84			701.034	58.118	0
IIDSVLDIVRKE	1	1	A0A0D3AT87	1399.82	0	1.29856e+08		54.63			467.278	71.7363	0.003589
IDNIFRF	1	2	A0A0H3Y304;A0A0D3EGT1	924.495	0	1.26427e+08		44.98			462.751	71.7202	0.142255
APGVQTPVIVRF	1	1	A0A0D3CBU1	1283.75	0	1.23671e+08		41.41			642.378	63.0531	0.019676
KVVDIVDTF	1	0		1035.58	0	120871943		48.33			1035.58	64.3699	0.125901
LDDPVFRPL	1	1	Q8W3J5	1071.59	0	1.18687e+08		40.85			536.296	63.0415	0.12511
HVNISPNPVGPDVGEL	1	1	A0A0D3AHF7	1643.84	0	1.18164e+08		49.09			822.426	60.3781	0
GPVIDDVKLI	2	1	A0A0D3AXN1	1068.63	0	116603307		45.85			534.819	66.906	0
VELGKEVDYLL	1	0		1277.7	0	1.1385e+08		47.08			639.356	74.65	0.063814
RQVIDIIPR	1	1	A0A0D2ZXA0	1109.68	0	1.10688e+08		53.26			555.344	50.1551	0
YDYIGNNPAKGGLF	1	1	A0A0D3BK57	1528.75	0	103938449		55.85			764.878	66.4847	0
IAIDTILNQK	1	1	A0A0D2ZQE9	1128.66	0	9.95515e+07		52.44			564.836	61.173	0
SVKALPGLPVSF	2	1	Q8H0E7	1214.72	0	96570217		51.55			1214.72	72.8658	0
NLVVLPG	1	2	A0A0D3BL43;A0A0D3BL41	711.442	0	89960734		49.38			711.442	61.2006	0.451826
VQVVIPG	1	0		711.442	0	89960734		49.38			711.442	61.2006	0.670878
QVVKIGL	1	0		756.5	0	8.95492e+07		41.69			756.5	54.5963	0.53284
ILKEDDIVGIL	2	1	A0A0D3D4U0	1227.72	0	8.87236e+07		42.86			614.365	79.7992	0.016265
HWDIPQTL	2	1	Q1W0X8	1009.51	0	86933694		51.23			1009.51	65.783	0.029041
TVGTVGAGRIGKLL	1	1	A0A0D3EFG5	1341.82	0	8.64202e+07		40.49			671.416	52.3498	0.003589
EIVTGKKPTEGVF	1	0		1404.78	0	8.55241e+07		42.67			702.892	51.8924	0.697036
LIDAVLDVVRKE	1	1	F8U7Z8	1369.81	0	8.2635e+07		40.6			685.408	65.5513	0
VTKSKPETGEVIGVF	1	1	A0A0D3AYU0	1590.88	0	8.00821e+07		40.53			795.943	50.8633	0
AKVINDRFGIVE	1	1	I3RXT6	1360.76	0	79179020		49.41			680.885	49.8708	0
AFYDYIGNNPAKGGLFR	1	1	A0A0D3BK57	1902.96	0	7.89662e+07		49.24			951.982	69.2956	0
KLSNPSFGDL	1	1	A0A0D3D8X0	1077.56	0	73916206		47.9			539.283	55.2862	0.063814
VQKPLEDITDSL	1	1	A0A0D3CND6	1357.72	0	7.07286e+07		54.24			679.366	66.1957	0.003589
YYHIVNPL	1	0		1018.54	0	6.94112e+07		45.75			1018.54	58.3222	0.147815
AGITDEDAAKVVDGL	1	1	A0A0D3D2A0	1473.75	0	6.7584e+07		59.38			737.377	68.4073	0
SSKAGLQFPVGRIA	1	1	A0A0D3DD18	1430.82	0	66194360		40.51			715.911	52.8737	0
SFDTPVYRF	1	1	A0A0D3DPE1	1131.55	0	6.50625e+07		40.69			566.278	63.7116	0.21823
DKEGIPPDQQRLIF	1	1	A0A0D3BEK5	1655.88	0	62427252		47.19			828.444	57.763	0
AHVTDPKVIDLL	1	1	A0A0D3CKW6	1320.76	0	6.05928e+07		45.15			660.881	58.7958	0
NTVGIPVNPTPL	1	1	A0A0D3EF89	1221.69	0	60477103		54.17			1221.69	66.4134	0
FIDIIKAA	1	1	A0A0D3BXQ9	890.537	0	5.74231e+07		40.56			890.537	58.9553	0.147815
AVTFPVRPGFGKL	1	1	A0A0D3BUB9	1388.81	0	56881396		44.19			694.908	58.6701	0.019676
FLVGLLT	1	0		762.477	0	5.56663e+07		44.66			381.742	55.1021	0.740999
SSRGPNHITPVILKPDVIAPGVN	1	1	A0A0D3CKD7	2381.34	0	5.52849e+07		68.89			794.45	54.6242	0
CRPKTGSSGGILK	1	0		1303.7	0	5.09459e+07		45.87			652.355	67.8107	0.418056
TAILKPDNEVRIL	1	1	A0A0D3BG01	1481.87	0	47937089		48.91			741.44	54.2344	0.003589
RDDGILL	1	0		801.449	0	4.77138e+07		41.83			801.449	54.5125	0.940466
DKLNLILL	1	0		941.605	0	4.40383e+07		40.35			941.605	70.4748	0.393596
IRSNILIL	1	0		941.605	0	4.40383e+07		40.35			941.605	70.4748	0.3154
LDKLNLIL	1	0		941.605	0	4.40383e+07		40.2			941.605	70.4748	0.438625
LKDINLIL	1	0		941.605	0	4.40383e+07		40.2			941.605	70.4748	0.712313
SLRNLILL	1	0		941.605	0	4.40383e+07		40.35			941.605	70.4748	0.434288
ESVVAI	2	0		617.352	0	4.0949e+07		40.17			617.352	59.1667	0.808184
SEVVAI	2	0		617.352	0	4.0949e+07		40.17			617.352	59.1667	0.954907
TDVVAI	2	0		617.352	0	4.0949e+07		40.17			617.352	59.1667	0.954907
FVDLEPTVIDEVRTG	1	1	A0A0D2ZXL5	1689.87	0	36665299		48.84			845.441	74.0301	0
ELAPYDPDWYYIR	1	1	A0A0D3AG29	1700.8	0	3.60904e+07		52.35			850.904	79.2629	0
IKIPF	4	0		617.403	0	34081720		40.04			309.205	59.5727	0.784129
AGRNIPFPDGVLIN	1	1	A0A0D3A520	1482.81	0	3.14059e+07		45.29			741.909	68.7464	0.030566
SLPPSLSPIYKL	1	1	A0A0D3B5V1	1314.77	0	28402732		45.83			1314.77	68.4201	0
RIADDDVVLIK	1	1	A0A0D3AC56	1256.72	0	2.78496e+07		46.73			628.864	49.0456	0.003589
VETIANLLQ	1	0		1000.57	0	2.78084e+07		40.96			1000.57	74.8748	0.85041
IVIHNPGEEED	1	1	A0A0D3AXN1	1251.59	0	2.70501e+07		44.46			626.298	44.8691	0.016265
GLTDQDIVAL	1	0		1044.56	0	2.69802e+07		42.7			1044.56	75.1757	0.145211
TERGADIVAL	1	0		1044.56	0	2.69802e+07		42.7			1044.56	75.1757	0.120996
KEPAIIIGGKL	1	1	A0A0D2ZQT1	1138.72	0	26970459		40.15			569.865	50.4963	0.019676
FHWDLPQTL	1	1	Q1W0X8	1156.58	0	2.5927e+07		45.16			1156.58	78.8819	0.029041
FIDLDTTL	1	1	A0A0H3Y304	937.491	0	2.4595e+07		44.36			937.491	80.1692	0.348775
SLVEDILDRA	1	1	A0A0D3CNC4	1130.61	0	24555606		40.37			565.807	85.1719	0.024582
WLGAPQLIDTNDEAKTL	1	1	A0A0D2ZQT0	1884.98	0	2.33649e+07		66.58			942.991	74.9719	0
VDPISILLA	1	0		940.574	0	23184412		40.46			940.574	71.7934	0.380137
DDLKLPTDDNLSAL	1	1	A0A0D3BHZ5	1529.77	0	2.14604e+07		46.09			765.391	75.7374	0.003589
HSNILL	3	0		696.405	0	2.13825e+07		41.24			696.405	49.0537	0.864613
SHNIIL	3	1	A0A0D3CRC8	696.405	0	2.13825e+07		41.24			696.405	49.0537	0.864613
ANVKLDLSLGISL	1	0		1342.8	0	2.10264e+07		48.21			1342.8	75.0011
GINKIVTGELVSL	1	0		1342.8	0	2.10264e+07		48.03			1342.8	75.0011
IAAPPVDIDGIREPVSGSL	2	1	A0A0H3XZM8	1906.03	0	2.05564e+07		47.66			953.519	71.2634	0
GKFSSIVPVVTL	1	2	A0A0D3BL43;A0A0D3BL41	1246.74	0	19117723		44.27			1246.74	73.3598	0.032354
KDLFDIM	1	0		881.446	0	1.66784e+07		40.45			441.226	76.1876	0.240702
DGVTLLALNLAG	1	0		1156.65	0	1.63525e+07		42.07			1156.65	69.3946
FPQLPLSLEI	1	0		1156.65	0	1.63525e+07		49.22			1156.65	69.3946	0.26329
RVKLPHLIR	1	1	A0A0D3A124	1131.75	0	1.26557e+07		64.85			377.922	46.061	0.030566
VVVSPPYVFLPL	1	1	A0A0D3BXQ9	1329.79	0	1.26389e+07		59.91			665.396	108.028	0
AEEGIVVGGGCILL	1	0		1329.71	0	12430319		41.47			665.361	89.4428	0.538351
VSDKALLDDPVFRPL	1	1	Q8W3J5	1684.93	0	1.21206e+07		40.1			842.969	69.1558	0
REDIDIA	1	0		831.412	0	1.13685e+07		52.43			831.412	78.8686	0.839014
VADDLDIA	1	0		831.412	0	1.13685e+07		52.43			831.412	78.8686	0.36166
VDFYHRY	1	1	A0A0D3CRC8	999.47	1.83555e+09	0	42.05		500.239	44.077			0.944242
VTNDVAKTL	1	1	A0A0D2ZQT1	960.538	1.46643e+09	0	54.76		480.773	38.304			0.078943
IKKVVDLQEE	1	2	A0A0D3AJM6;A0A0D3EEL1	1200.69	1391243403	0	40.09		600.847	37.5289			0
GRTDPNQNTGIVIQ	1	1	A0A0D2ZZ69	1512.78	5.62605e+08	0	46.94		756.893	43.221			0.078943
SPVETSVPVVE	1	0		1142.6	5.53008e+08	0	43.43		571.802	41.0969			0.846829
TFGDSNFDAGNR	1	1	A0A0D3CQU2	1300.56	4.95891e+08	0	54.03		650.783	46.9477			0
AQGRTDPNQNTGIVIQ	1	1	A0A0D2ZZ69	1711.88	480931706	0	60.78		856.442	43.1223			0
SDKDYKEPPPAPL	1	1	F2X5J8	1456.74	4.33716e+08	0	41.22		728.872	40.9694			0.292084
GANPVLITR	1	0		940.56	415491511	0	44.84		470.783	40.2838			0.193628
LSDEQVRKL	1	0		1087.61	363299188	0	45.96		544.31	37.0099			0.056842
SGGGGGGSGNETGKDGPGKVGPL	2	1	A0A0D3CQ47	1941.93	3.13924e+08	0	45.56		971.47	37.4065			0
DIHSPRIPSTEE	1	1	A0A0D3AJM6	1380.68	3.08889e+08	0	40.28		690.844	42.1696			0.046268
FAPIPTPGGGGSKPGGSGNESGGGGGGSKPGGSGNE	1	1	A0A0D3CQ47	3026.39	2.66128e+08	0	44.09		1009.47	42.6738			0
TGKDGPGKVGPL	1	1	A0A0D3CQ47	1125.63	227761726	0	46.64		563.318	36.0587			0
GDSNPSNPKPRFGAY	1	1	A0A0D3CTH4	1606.77	2.22532e+08	0	54.41		803.887	40.6746			0
IQDKEGIPPDQQRL	1	1	A0A0D3BEK5	1636.87	211694133	0	66.67		818.939	39.4483			0.04305
NKVVDLPQE	1	0		1041.56	208759113	0	43.13		521.283	42.6663			0.316292
PTRNIAIGGVQEE	1	1	A0A0D2ZPE6	1383.72	1.95981e+08	0	53.57		692.366	44.3832			0
PEGTGGFIEPR	1	1	A0A0D3BVE4	1159.58	1.80443e+08	0	48.14		580.292	44.4063			0
KTFQGPPHGIQVE	1	1	P48686	1437.75	178258315	0	40.32		719.38	43.039			0
ITLRPSPPPPQ	1	1	A0A0D3A271	1202.69	1.68936e+08	0	66.94		601.849	42.8735			0.037162
STGDVLPIKRGPQ	1	1	A0A0D3BMM4	1367.77	1.68929e+08	0	44.2		684.388	39.5136			0.028171
RVNENQNKPVTF	1	0		1445.75	164108426	0	41.46		723.38	36.3706			0.902676
KIEDDLKVR	1	1	A0A0D3DPE1	1115.65	149918792	0	46.62		372.553	36.7423			0.032586
RDNIQGITKPAIR	1	1	A0A0D3B2L1	1481.86	138400393	0	49		741.433	37.6065			0
DSNPSNPKPRFGAY	1	1	A0A0D3CTH4	1549.74	1.38059e+08	0	41.43		775.375	42.5908			0.519174
SLTTGNAGGRL	1	1	A0A0D3C2I5	1046.56	9.75965e+07	0	42.6		523.784	38.5188			0.028171
LNEDELRDA	1	0		1074.51	92807094	0	55.34		537.758	43.6166			0.562978
GYNPSYGARPL	1	1	A0A0D3B420	1194.59	9.22849e+07	0	40.38		597.8	46.572			0
GTPKDSLNLNQQVR	1	1	A0A0D3CQU2	1569.84	9.20056e+07	0	56.88		785.423	40.6952			0.037162
ETGKDGPGKVGPL	1	1	A0A0D3CQ47	1254.67	81811911	0	42.02		627.84	36.9408			0
KLTGKLRDGMTAT	1	1	A0A0D3A1P0	1391.77	7.03591e+07	0	40.66		696.39	35.1514			0
RSIGKNVSPIEVK	1	1	A0A0D3E051	1426.84	61296571	0	57.47		713.924	36.0112			0
IDEPSFTQPK	1	1	A0A0D3BEN2	1161.58	6.01781e+07	0	54.13		581.294	47.1048			0
KWAGGKPEKPILR	1	0		1479.88	5.91391e+07	0	51.52		370.726	34.7973			0.919822
YANTGPLPSHGFVRQ	1	1	A0A0D3A6F6	1643.83	5.18174e+07	0	48.15		822.421	46.9275			0
AHYDQVLDTT	1	1	A0A0D3AJM6	1162.54	51348971	0	75		1162.54	45.6906			0.562978
LFDEQTDEYKE	1	1	A0A0D2ZW65	1416.62	5.10697e+07	0	50.36		708.814	50.8069			0
VGDFHRTL	1	0		944.497	5.1021e+07	0	43.71		472.752	37.4875			0.445008
FQNVKLS	1	1	A0A0D3EF89	835.47	4.04478e+07	0	51.81		835.47	39.764			0.242
EFKEDVADYA	1	0		1186.53	3.30402e+07	0	40.27		1186.53	49.0858			0.361978
FKEEDGIDYA	1	0		1186.53	3.30402e+07	0	40.27		1186.53	49.0858			0.056842
KVVKGDDVIVE	1	0		1200.69	3.24776e+07	0	46.27		600.846	36.039			0.653498
SSDVYDKL	1	1	A0A0D2ZUP3	926.45	3.05139e+07	0	41.01		926.45	45.1479			0.845219
KATTHPVVSDKL	1	0		1295.74	2.93366e+07	0	43.89		648.371	34.6852			0.569089
PDSITWR	1	0		874.443	2.87086e+07	0	43.67		437.725	47.0444			0.821772
VDLDNEDYGKPV	1	1	A0A0D3ED69	1363.64	2.66683e+07	0	70.6		682.324	50.9358			0
YHFDKGFGS	1	0		1057.48	2.0658e+07	0	48.7		1057.48	45.4963			0.24755
GNIIVGDDGTAT	1	0		1132.55	1.99313e+07	0	43.43		1132.55	49.7686			0.478058
SDPEGTGGFIEPR	1	1	A0A0D3BVE4	1361.63	1.5185e+07	0	45.22		681.321	48.7287			0
FDMTVDGK	1	0		912.416	1.19508e+07	0	43.9		912.416	46.0208			0.795737
FDMTVGDK	1	0		912.416	1.19508e+07	0	44.15		912.416	46.0208			0.617996

## Sheet: PeptideRanker
PeptideRanker Results
PeptideRanker orders the peptides you entered according to their score							Sequence	PeptideRanker score	Protein Group Accessions	MH+ [Da]	FR8 Area	FR12 Area	IonScore FR8	IonScore FR12
	Sequence	Score					IDNIFRF	0.9	A0A0H3Y304;A0A0D3EGT1	924.495	0	1.26427e+08		44.98
0	IDNIFRF	0.9					ADLAHLPF	0.84	P48438	883.469	0	303879736		52.27
1	ADLAHLPF	0.84					SIGLPLALCL	0.83		999.601	0	1.85089e+08		44.03
2	SIGLPLALCL	0.83					LDDPVFRPL	0.81	Q8W3J5	1071.59	0	1.18687e+08		40.85
3	SFDTPVYRF	0.81					SFDTPVYRF	0.81	A0A0D3DPE1	1131.55	0	6.50625e+07		40.69
4	LDDPVFRPL	0.81					FHWDLPQTL	0.81	Q1W0X8	1156.58	0	2.5927e+07		45.16
5	FHWDLPQTL	0.81					FLSDKLKPF	0.79	A0A0D3ED69	1094.63	0	2.04113e+08		45.05
6	SLPPSLSPIYKL	0.79					SLPPSLSPIYKL	0.79	A0A0D3B5V1	1314.77	0	28402732		45.83
7	FLSDKLKPF	0.79					SKGFTSPLFGIN	0.77	A0A0D3CQ47	1267.67	0	180065808		41.21
8	SKGFTSPLFGIN	0.77					AVTFPVRPGFGKL	0.77	A0A0D3BUB9	1388.81	0	56881396		44.19
9	AVTFPVRPGFGKL	0.77					AFYDYIGNNPAKGGLFR	0.77	A0A0D3BK57	1902.96	0	7.89662e+07		49.24
10	AFYDYIGNNPAKGGLFR	0.77					AEEGIVVGGGCILL	0.75		1329.71	0	12430319		41.47
11	AEEGIVVGGGCILL	0.75					FKDENGGKLIGF	0.74	A0A0D3CQ47	1324.69	0	452311911		42.12
12	YDYIGNNPAKGGLF	0.74					YDYIGNNPAKGGLF	0.74	A0A0D3BK57	1528.75	0	103938449		55.85
13	FKDENGGKLIGF	0.74					GYNPSYGARPL	0.73	A0A0D3B420	1194.59	9.22849e+07	0	40.38
14	ILLPKPGYPSNLIR	0.73					ILLPKPGYPSNLIR	0.73	A0A0D3BL41	1580.96	0	1.96603e+08		41.46
15	GYNPSYGARPL	0.73					PDSITWR	0.72		874.443	2.87086e+07	0	43.67
16	PDSITWR	0.72					GNIFDGIQRPL	0.72		1229.67	0	238077512		43.81
17	KWAGGKPEKPILR	0.72					KWAGGKPEKPILR	0.72		1479.88	5.91391e+07	0	51.52
18	KGALDGGLDIPHSDKRFAGF	0.72					KGALDGGLDIPHSDKRFAGF	0.72	A0A0D3BDA5	2101.09	0	1.29975e+08		42.84
19	GNIFDGIQRPL	0.72					GDSNPSNPKPRFGAY	0.71	A0A0D3CTH4	1606.77	2.22532e+08	0	54.41
20	GDSNPSNPKPRFGAY	0.71					IKIPF	0.7		617.403	0	34081720		40.04
21	IKIPF	0.7					GGLHLIGL	0.7		779.479	0	5.80033e+08		45.91
22	GGLHLIGL	0.7
23	SGGVLPNINPVLLPK	0.69
24	LLFFIDPLPI	0.69
25	KEPAIIIGGKL	0.69
26	DSNPSNPKPRFGAY	0.69
27	ELAPYDPDWYYIR	0.67
28	REPGPVKGGGSVIAF	0.66
29	AGRNIPFPDGVLIN	0.66
30	KDLFDIM	0.65
31	VDFYHRY	0.64
32	VSDKALLDDPVFRPL	0.63
33	HWDIPQTL	0.63
34	VVVSPPYVFLPL	0.61
35	SKGFTSPLFGID	0.61
36	GGLIHIGL	0.61
37	APGVQTPVIVRF	0.61
38	SVKALPGLPVSF	0.6
39	LARPVIGGL	0.59
40	KLSNPSFGDL	0.59
41	SDKDYKEPPPAPL	0.58
42	RDDGILL	0.58
43	CRPKTGSSGGILK	0.57
44	SLRNLILL	0.56
45	NLAFDRDLIGPA	0.56
46	SSKAGLQFPVGRIA	0.55
47	GLQFPVGRIA	0.55
48	VKNPNPVPIPL	0.53
49	KLKDRFYIQPL	0.53
50	IAAPPVDIDGIREPVSGSL	0.52
51	FPQLPLSLEI	0.52
52	DKEGIPPDQQRLIF	0.52
53	VGDFHRTL	0.5
54	TGKDGPGKVGPL	0.5
55	SDPEGTGGFIEPR	0.5
56	FLVGLLT	0.5
57	YHFDKGFGS	0.48
58	SHNIIL	0.48
59	DFGVSL	0.48
60	GANPVLITR	0.47
61	DKLNLILL	0.47
62	VDPISILLA	0.46
63	IRSNILIL	0.46
64	HSNILL	0.46
65	FDGVSL	0.43
66	ANVKLDLSLGISL	0.43
67	YYHIVNPL	0.42
68	YANTGPLPSHGFVRQ	0.41
69	KPEGTSLLKL	0.41
70	GPVIDDVKLI	0.4
71	ETGKDGPGKVGPL	0.4
72	KIIAGPAEKPMIVV	0.39
73	AFKDDDVPDLTKL	0.39
74	RGEELVSGGLL	0.37
75	QPLAVL	0.37
76	FIDLDTTL	0.37
77	TFGDSNFDAGNR	0.36
78	PEGTGGFIEPR	0.36
79	LDKLNLIL	0.36
80	GKFSSIVPVVTL	0.35
81	SSDVYDKL	0.34
82	IDEPSFTQPK	0.34
83	GINKIVTGDLISL	0.34
84	AKVINDRFGIVEGL	0.34
85	SLLPKILPVYKE	0.33
86	RQVIDIIPR	0.33
87	DDLKLPTDDNLSAL	0.33
88	VQITGLPL	0.32
89	KLELPDGPVTF	0.32
90	IHNLLGI	0.32
91	GGLIHAVL	0.32
92	IQDKEGIPPDQQRL	0.31
93	HYSDEDVIRIL	0.31
94	GATVRDLLIK	0.31
95	SLTTGNAGGRL	0.3
96	LKDINLIL	0.3
97	LDVGLIR	0.3
98	DGVTLLALNLAG	0.3
99	LILHNGL	0.29
100	ITLRPSPPPPQ	0.29
101	FAPIPTPGGGGSKPGGSGNESGGGGGGSKPGGSGNE	0.29
102	AHVTDPKVIDLL	0.29
103	WLGAPQLIDTNDEAKTL	0.28
104	HVNISPNPVGPDVGEL	0.28
105	TVGTVGAGRIGKLL	0.27
106	TAILKPDNEVRIL	0.27
107	RVKLPHLIR	0.27
108	FDMTVDGK	0.27
109	STGDVLPIKRGPQ	0.26
110	LHPIVSPISDFE	0.26
111	ILKEDDIVGIL	0.26
112	FIDIIKAA	0.26
113	AKVINDRFGIVE	0.26
114	GTPKDSLNLNQQVR	0.25
115	EIRSKLLSL	0.25
116	VKVLGDPL	0.24
117	GINKIVTGELVSL	0.24
118	FDMTVGDK	0.24
119	AGITDEDAAKVVDGL	0.23
120	VADDLDIA	0.22
121	SLVEDILDRA	0.22
122	NTVGIPVNPTPL	0.22
123	KTFQGPPHGIQVE	0.22
124	KIEDDLKVR	0.22
125	VDLDNEDYGKPV	0.21
126	SLIGEIITGK	0.21
127	NLVVLPG	0.21
128	LSDEQVRKL	0.21
129	KNIEDILLK	0.21
130	HVAEDVLKL	0.21
131	GLTDQDIVAL	0.21
132	FQNVKLS	0.21
133	VTKSKPETGEVIGVF	0.2
134	VQVATIPL	0.2
135	SGGGGGGSGNETGKDGPGKVGPL	0.2
136	PQIAVI	0.2
137	KIKDKHYSDEDVIRIL	0.19
138	VSSILVQISL	0.18
139	KVVDIVDTF	0.18
140	VVDALRPVTDLPLDVH	0.17
141	RIADDDVVLIK	0.17
142	SSRGPNHITPVILKPDVIAPGVN	0.16
143	RDNIQGITKPAIR	0.16
144	GNIIVGDDGTAT	0.16
145	FKEEDGIDYA	0.16
146	EIVTGKKPTEGVF	0.16
147	VQVVIPG	0.15
148	QVVKIGL	0.15
149	KLTGKLRDGMTAT	0.15
150	IAIDTILNQK	0.15
151	RVNENQNKPVTF	0.13
152	IIDSVLDIVRKE	0.13
153	FVDLEPTVIDEVRTG	0.13
154	DIHSPRIPSTEE	0.13
155	VQKPLEDITDSL	0.12
156	VELGKEVDYLL	0.12
157	RSIGKNVSPIEVK	0.12
158	REDIDIA	0.12
159	LIDAVLDVVRKE	0.12
160	LIDSVLDVVRKE	0.11
161	EFKEDVADYA	0.11
162	AQGRTDPNQNTGIVIQ	0.11
163	AHYDQVLDTT	0.11
164	KATTHPVVSDKL	0.1
165	GRTDPNQNTGIVIQ	0.1
166	VTNDVAKTL	0.09
167	TERGADIVAL	0.09
168	SPVETSVPVVE	0.09
169	LNEDELRDA	0.09
170	LFDEQTDEYKE	0.09
171	VETIANLLQ	0.08
172	NKVVDLPQE	0.08
173	SEVVAI	0.07
174	PTRNIAIGGVQEE	0.07
175	KVVKGDDVIVE	0.06
176	ESVVAI	0.06
177	TDVVAI	0.05
178	IVIHNPGEEED	0.05
179	EVLNVESNII	0.05
180	IKKVVDLQEE	0.04
